# Supplementary material for: The Cut-off Values of Triglycerides and Glucose Index for Metabolic Syndrome in American and Korean Adolescents
Source: PubMed Central journal article supplement — J Korean Med Sci. 2016 Dec 29;32(3):427–33. doi: 10.3346/jkms.2017.32.3.427 (PMC5290101; doi:10.3346/jkms.2017.32.3.427), 2016-12-29
Supplement: jkms-32-427-s001.pdf [file jkms-32-427-s001.pdf]

**Supplementary Table 1.** Pearson correlation test between TyG index and HOMA-IR by ethnicity

| Characteristics              | <i>r</i> | <i>P</i> value |
|------------------------------|----------|----------------|
| Mexican American (n = 1,161) | 0.447    | < 0.001        |
| Non-Hispanic White (n = 973) | 0.361    | < 0.001        |
| Non-Hispanic Black (n = 997) | 0.386    | < 0.001        |
| Korean (n = 2,515)           | 0.361    | < 0.001        |

TyG = triglycerides and glucose, HOMA-IR = homeostasis model assessment of insulin resistance.
